# Supplementary material for: Aligned structures of mesogenic motifs in epoxy resin and their thermal conductivities
Source: Royal Society of Chemistry journal article supplement (doi:10.1039/d1na00896j), 2022-01-01
Supplement: d1na00896j2.pdf [file d1na00896j2.pdf]

ARTICLE

## Title

Author Full Name,<sup>\*a</sup> Author Full Name<sup>b</sup> and Author Full Name<sup>c</sup>

Received 00th January 20xx,  
Accepted 00th January 20xx

Abstract text goes here. The abstract should be a single paragraph that summarises the content of the article

DOI: 10.1039/x0xx00000x

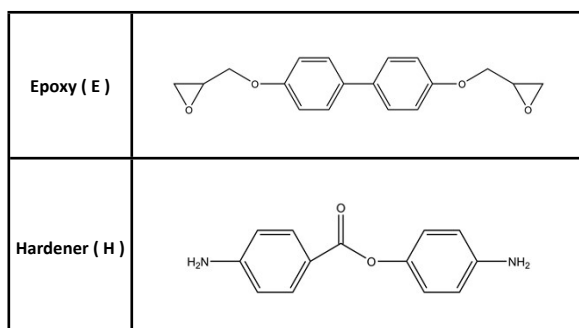

<sup>a</sup> Address here.

<sup>b</sup> Address here.

<sup>c</sup> Address here.

† Footnotes relating to the title and/or authors should appear here.

Electronic Supplementary Information (ESI) available: [details of any supplementary information available should be included here]. See DOI: 10.1039/x0xx00000x
